# Supplementary material for: Poly(l-Ornithine)-Based Polymeric Micelles as pH-Responsive Macromolecular Anticancer Agents
Source: MDPI journal article supplement (doi:10.3390/pharmaceutics15041307), 2023-04-21
Supplement: s1 [file s1]

# Supplementary Materials: Poly(L-ornithine)-based Polymeric Micelles as pH-responsive Macromolecular Anticancer Agents

Miao Pan, Chao Lu, Wancong Zhang, Huan Huang, Xingyu Shi, Shijie Tang and Daojun Liu

## Supplementary Materials

### Materials

$\delta$ -Benzyloxycarbonyl-L-ornithine and L-phenylalanine were supplied by GL Biochem (Shanghai, China). Hexylamine (99%) and 1,2-dicarboxylic-cyclohexene anhydride (DCA) were obtained from Aladdin Biochemical Technology Co. (Shanghai, China). Triphosgene and hydrogen bromide in acetic acid (33% *w/w*) were purchased from TCI Development Co. (Shanghai, China). Dichloromethane (DCM), ethyl acetate, petroleum ether, tetrahydrofuran (THF), and dimethyl sulfoxide (DMSO) were purchased from Sigma-Aldrich (Singapore) and were dried prior to use. Dulbecco's modified Eagle's medium (DMEM), alamarBlue and lactate dehydrogenase (LDH) assay kits were bought from Invitrogen (Singapore). 3,3'-Diocetadecyloxycarbocyanine perchlorate (DiO), propidium iodide (PI), calcein acetoxymethyl ester (calcein-AM), bisbenzimidazole (Hoechst) and an Annexin V-FITC Apoptosis Detection kit were purchased from Meilun Biotechnology Co. (Dalian, China). Dialysis tubes with molecular weight cut-offs of 1.0, 2.0, and 3.5 kDa were supplied by Viskase (Darien, IL).

Human luminal breast cancer cells (MCF-7), human breast ductal carcinoma cells (BT474), human non-small cell lung cancer cells (A549), human cervical cancer cells (HeLa), human normal liver cells (LO2), and human renal tubular epithelial cells (HK-2) were obtained from ATCC. Human hepatocellular carcinoma cells (HepG2) were provided by Professor Wenxiu Ni from the Department of Pharmacy, Shantou University Medical College, China. DOX-resistant MCF-7/ADR cells were kindly provided by Dr. Yiyan Yang from The Nanos, Institute of Bioengineering and Nanotechnology, Singapore.

### Synthesis and characterization of polypeptide

$\delta$ -Benzyloxycarbonyl-L-ornithine *N*-carboxyanhydride (ZLO-NCA) and L-phenylalanine *N*-carboxyanhydride (LF-NCA) were prepared upon phosgenation of ZLO and ZLF in anhydrous ethyl acetate and anhydrous THF, respectively, following our previously reported method.[36] Hexylamine was employed to initiate the sequential ring-opening polymerization of ZLO-NCA and LF-NCA to produce PZLO-*b*-PLF, as illustrated in Scheme 1. The produced PZLO<sub>30</sub> (**PZ1**), PZLO<sub>30</sub>-*b*-PLF<sub>4</sub> (**PZ2**), PZLO<sub>30</sub>-*b*-PLF<sub>8</sub> (**PZ3**), and PZLO<sub>30</sub>-*b*-PLF<sub>12</sub> (**PZ4**) were characterized by <sup>1</sup>H NMR in DMSO-*d*<sub>6</sub> and their molecular weights were measured by GPC using Shodex KD802.5 and KD804 columns and a 2414 RI detector. DMF was employed as the eluent at a flow rate of 1 mL/min and the molecular weights were calibrated using poly(methyl methacrylate) (PMMA) standards.

In the second step, the benzyloxycarbonyl groups in the side chains of PZLO were deprotected in HBr/CH<sub>3</sub>COOH to prepare the final products PLO<sub>30</sub> (**P1**), PLO<sub>30</sub>-*b*-PLF<sub>4</sub> (**P2**), PLO<sub>30</sub>-*b*-PLF<sub>8</sub> (**P3**), and PLO<sub>30</sub>-*b*-PLF<sub>12</sub> (**P4**) following our previously reported method.[43] The final products were obtained by dialyzing thoroughly against deionized water followed by lyophilization. The final products were characterized by <sup>1</sup>H NMR in D<sub>2</sub>O and their molecular weights were measured by GPC using an Ultrahydrogel linear column and a 2414 RI detector. HAc-NaAc buffer (0.5 M, pH 4.5) was used as the eluent at a flow rate of 1 mL min<sup>-1</sup>, and the molecular weights were calibrated using poly(ethylene glycol) (PEG) standards.

pH-sensitive copolypeptides PLO(DCA)-*b*-PLF were obtained by modification of the side chains of PLO in PLO-*b*-PLF with DCA.[46] Briefly, PLO-*b*-PLF was dissolved in 0.2 M bicarbonate buffer at pH 9.2. DCA powder (1.5 eq to primary amino groups of PLO-*b*-PLF) was then added slowly to the polymer solution where the pH of the solution was kept at approximately 9.0 by the addition of 1 M NaOH. The solution was stirred at 4°C for 1.5 h, followed by the sequential 2-h dialyses against 0.1 M, 0.05 M, 0.01 M, 0.005 M bicarbonate buffer and deionized water. The final products were obtained following lyophilization and characterized by  $^1\text{H}$  NMR in  $\text{D}_2\text{O}$ .

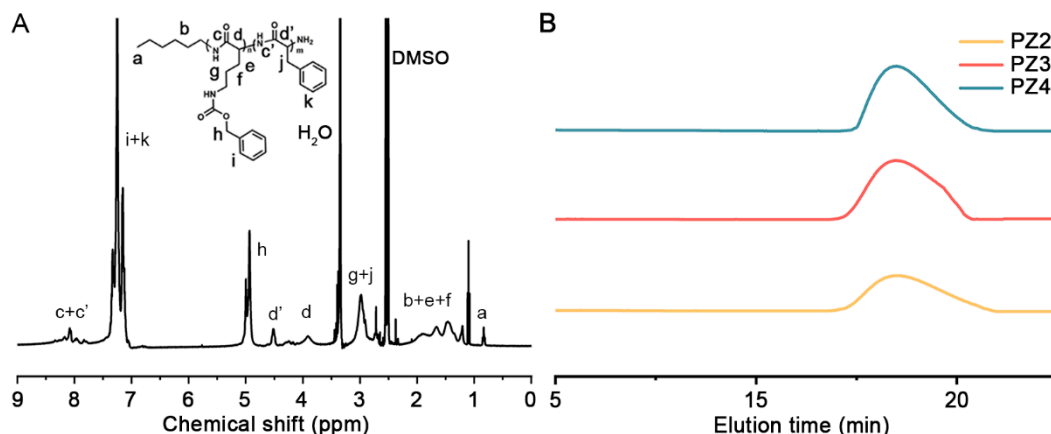

**Figure S1.** Representative  $^1\text{H}$  NMR spectrum (A) and GPC chromatograms (B) of PZLO-*b*-PLF.

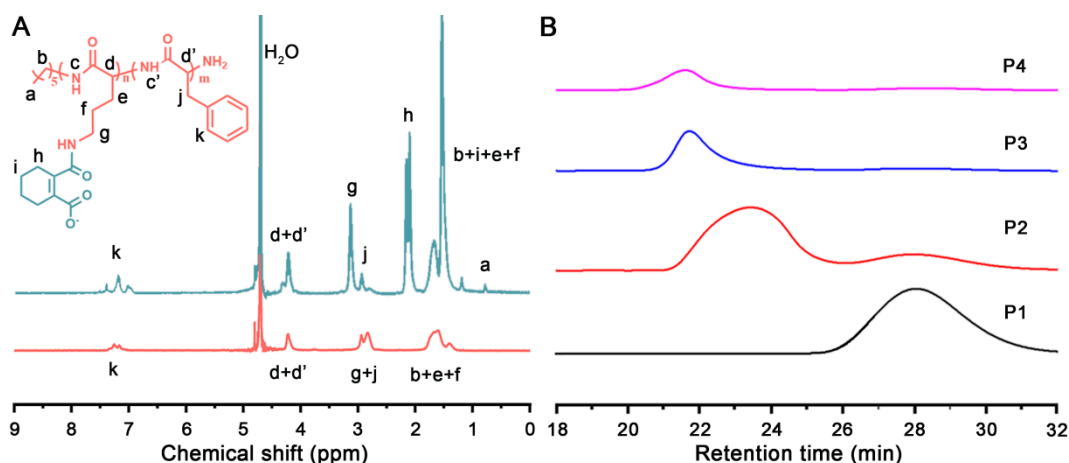

**Figure S2.** Representative  $^1\text{H}$  NMR spectra (A) of PLO-*b*-PLF (red) and PLO(DCA)-*b*-PLF (blue) in  $\text{D}_2\text{O}$ , and GPC chromatograms (B) of PLO-*b*-PLF.

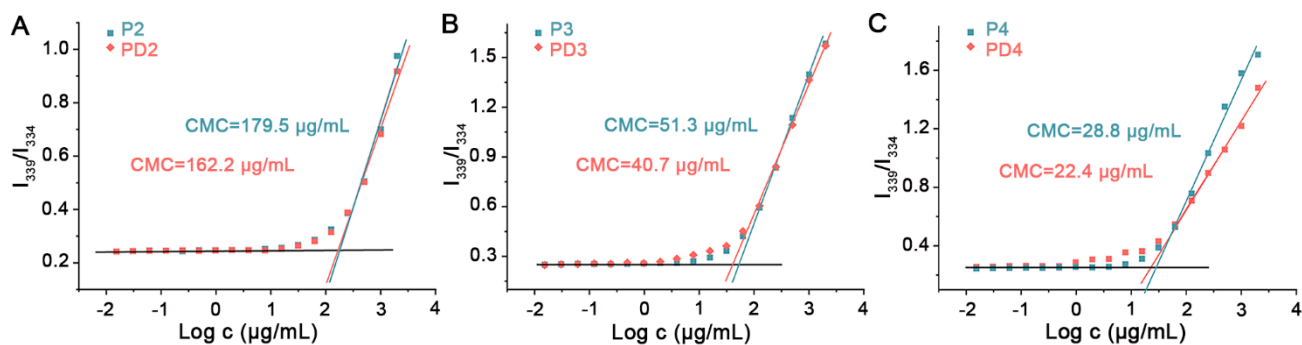

**Figure S3.** Plot of the  $I_{339}/I_{334}$  of pyrene vs.  $\log(c)$  of (A) P2 and PD2, (B) P3 and PD3, and (C) P4 and PD4. The CMCs of P2, P3, and P4 were determined in PBS at pH 7.4, whereas the CMCs of PD2, PD3, and PD4 were determined in bicarbonate buffer at pH 9.2.

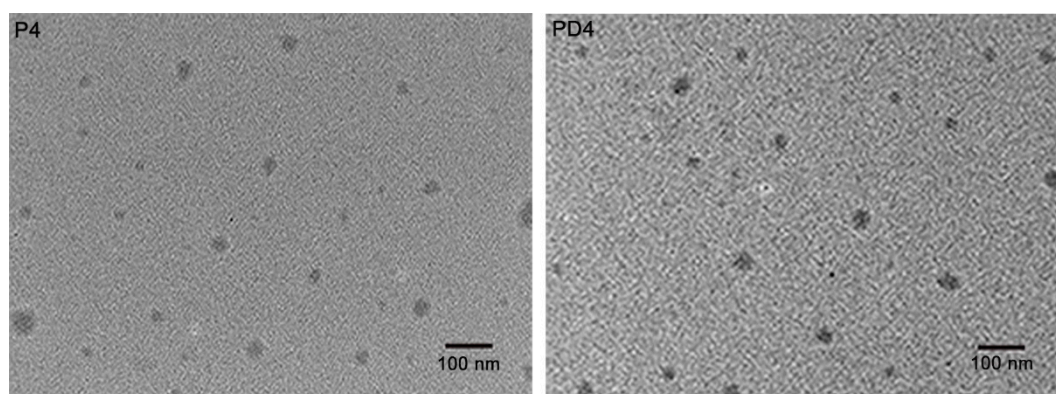

**Figure S4.** TEM images of polymeric micelles formed from **P4** and **PD4**.

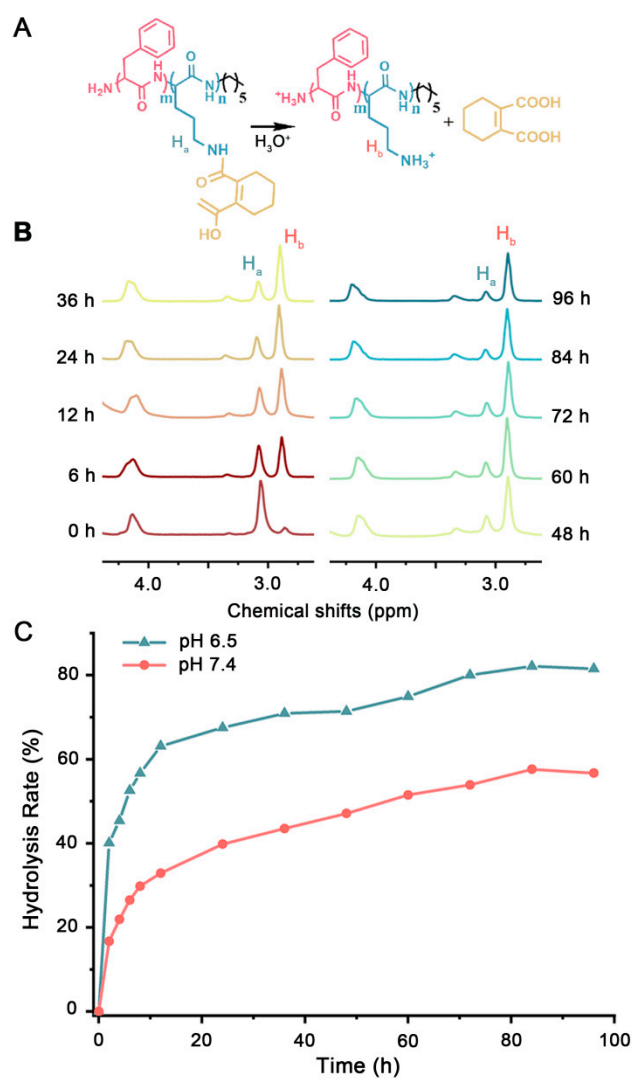

**Figure S5.** (A) Hydrolysis scheme of **PD4**; (B)  $^1\text{H}$  NMR spectra of **PLO(DCA)** as a function of incubation time at pH 6.5; (C) hydrolysis kinetics of **PLO(DCA)** at pH 6.5 and pH 7.4.

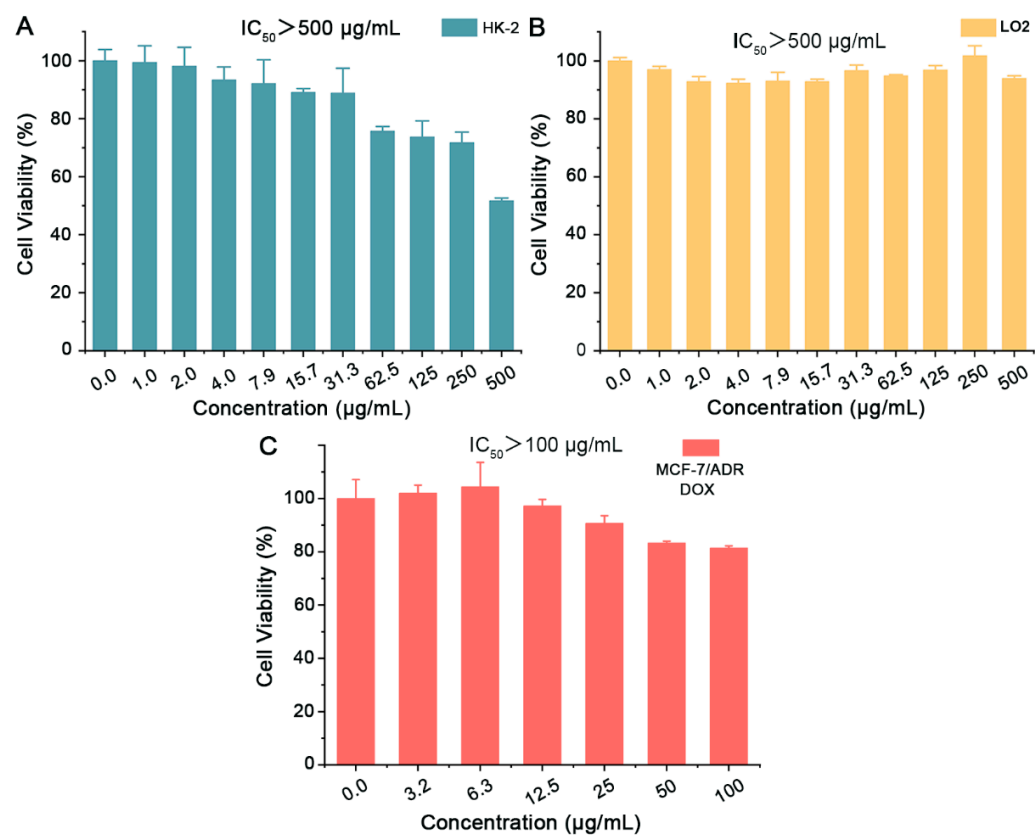

**Figure S6.** Viability of (A) HK-2 cells, (B) LO2 cells after incubation with different concentrations of PD4 for 24 h at pH 7.4. as well as (C) MCF-7/ADR cells after incubation with different concentrations of DOX for 24 h.

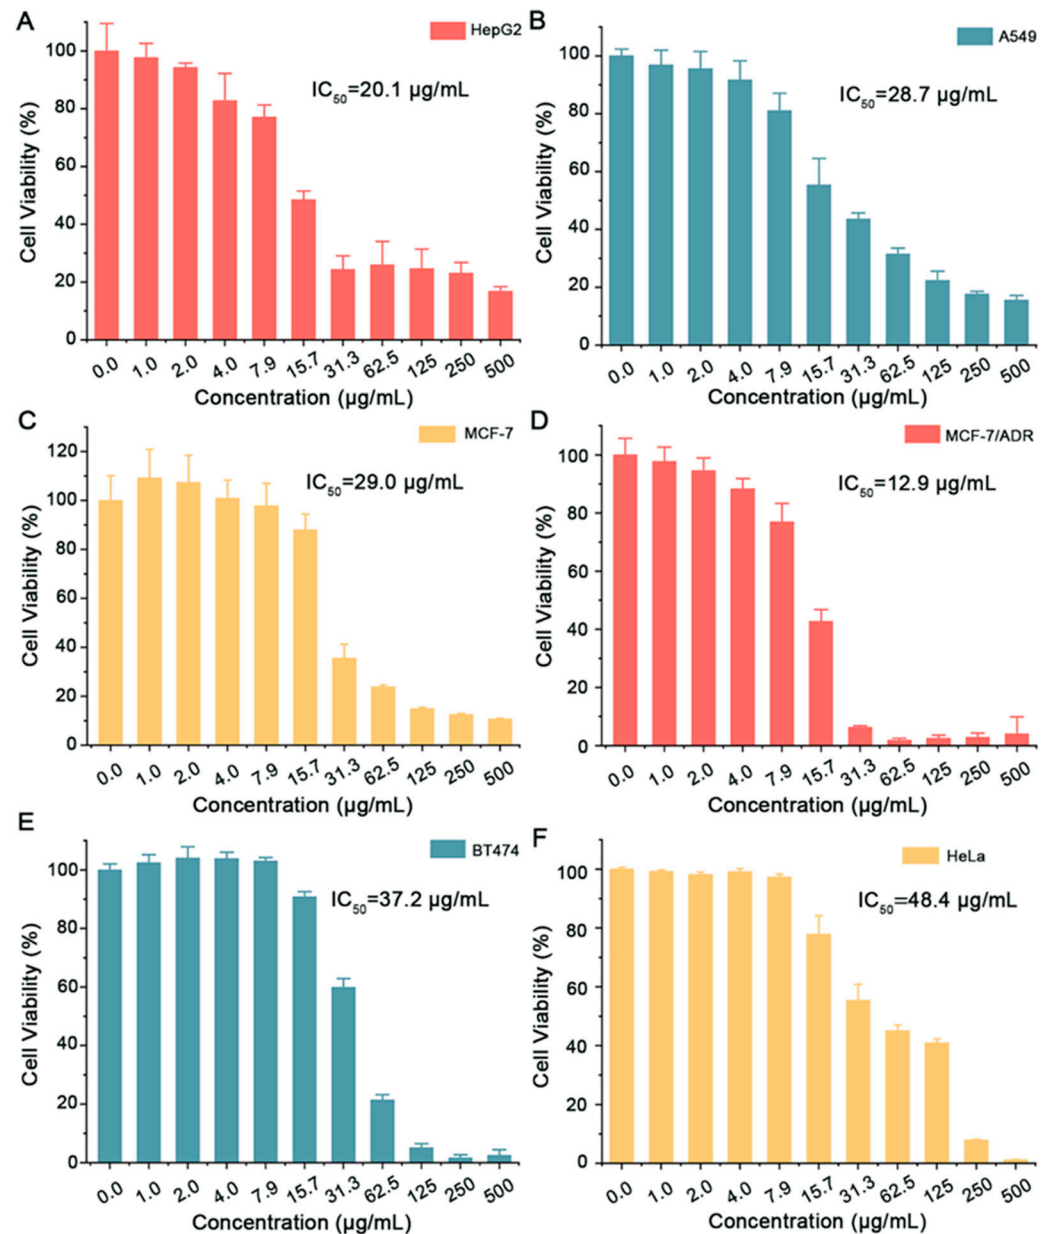

Figure S7. (A–F) Viability of different cancer cells after incubation with different concentrations of PD4 for 24 h at pH 6.5.

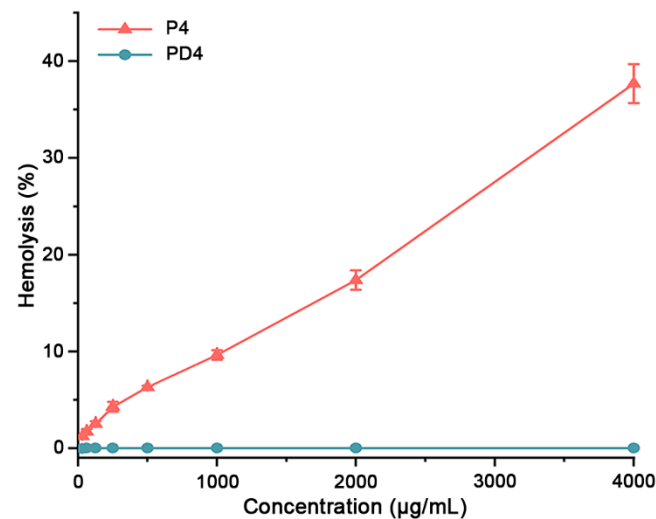

Figure S8. Hemolysis of P4 and PD4 as a function of their concentrations at pH 7.4.

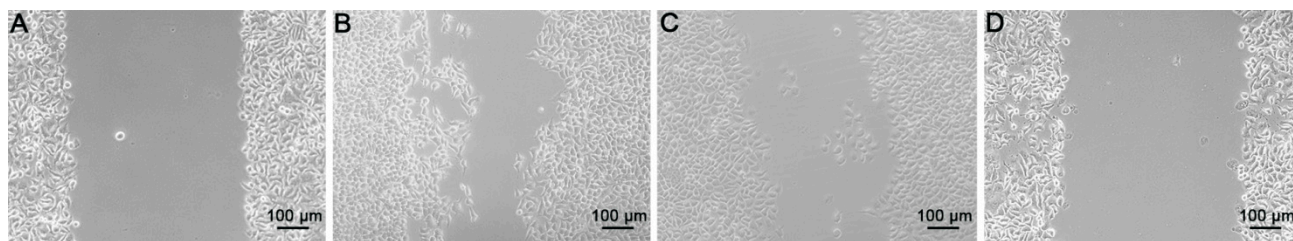

**Figure S9.** Effect of **PD4** treatment on the migration of HepG2 cancer cells. Photographs of HepG2 cells at (A) 0 h, (B) 24 h without treatment, (C) 24 h with 100 µg/mL **PD4** treatment at pH 7.4, and (D) 24 h with  $0.25 \times IC_{50}$  (5 µg/mL) of **PD4** treatment at pH 6.5.

**Table S1.** Degree of polymerization (DP) and molecular weights of PZLO-*b*-PLF.

| Polymer    | DP of PZLO- <i>b</i> -PLFm |                  |                  |                  | Molecular weight (kDa) |       |             |
|------------|----------------------------|------------------|------------------|------------------|------------------------|-------|-------------|
|            | n <sub>calc</sub>          | m <sub>cal</sub> | n <sub>NMR</sub> | m <sub>NMR</sub> | Calc.                  | H NMR | GPC (PDI)   |
| <b>PZ1</b> | 30                         | 0                | 30.4             | 0                | 7.48                   | 7.64  | No test     |
| <b>PZ3</b> | 30                         | 4                | 30.4             | 4.09             | 8.07                   | 8.24  | 8.33 (1.73) |
| <b>PZ3</b> | 30                         | 8                | 29.2             | 7.91             | 8.66                   | 8.51  | 8.97 (1.63) |
| <b>PZ4</b> | 30                         | 12               | 29.1             | 11.3             | 9.24                   | 8.98  | 9.43 (1.59) |

## References

1. Pan, M.; Lu, C.; Zheng, M.; Zhou, W.; Song, F.; Chen, W.; Yao, F.; Liu, D.; Cai, J., Unnatural amino acid-based star-shaped poly(L-ornithine)s as emerging long-term and biofilm-disrupting antimicrobial peptides to treat *Pseudomonas aeruginosa* infected burn wounds. *Adv. Healthc. Mater.* **2020**, *9*, e2000647.
2. Zheng, M.; Lin, H.; Zhang, W.; Tang, S.; Liu, D.; Cai, J., Poly(L-ornithine)-grafted zinc phthalocyanines as dual-functional antimicrobial agents with intrinsic membrane damage and photothermal ablation capacity. *ACS Infect. Dis.* **2021**, *7*, 2917–2929.
3. Maeda, Y.; Pittella, F.; Nomoto, T.; Takemoto, H.; Nishiyama, N.; Miyata, K.; Kataoka, K., Fine-tuning of charge-conversion polymer structure for efficient endosomal escape of siRNA-loaded calcium phosphate hybrid micelles. *Macromol. Rapid Commun.*, **2014**, *35*, 1211–1215.
